# Supplementary material
Source: MDPI journal article supplement (https://www.mdpi.com/2227-9717/4/2/18)
Supplement: s1 [file s1]

**Supplementary Materials: Effects of catalysts and membranes on the performance of membrane reactors in steam reforming of ethanol at the moderate temperature.**

**Manabu Miyamoto,*,1 Yuki Yoshikawa,2 Yasunori Oumi,3 Shin-ichi Yamaura4 and
Shigeyuki Uemiya,*,1**

The difference in flow system of reactors in Figure 2 and Table 1

The schematic image of the reactor was shown in Figure S1. The feed flow was introduced horizontally along the catalyst bed. After the refinement, the feed flow was introduced vertically to the catalyst bed but the outlet was not chenged. The change in position of inlet is likely to improve the contacting pattern of feed gas and catalysts, resulting higher H2 yield and conversion to C1 products in Table 1 than those in Figure 2.

**Figure S1.** Schematic images of the reactor before (**a**) and after (**b**) the refinment.
